# Supplementary material
Source: publisher figshare collection journal article supplement (https://acs.figshare.com/ndownloader/files/35118808)
Supplement: Supplementary file 1 [file 35118808]

# Supporting Information for Peel Adhesion Strength between Epoxy Resin and Hydrated Silica Surfaces: A Density Functional Theory Study

Yosuke Sumiya, Yuta Tsuji, Kazunari Yoshizawa\*

Institute for Materials Chemistry and Engineering and IRCCS, Kyushu University, Nishi-ku,  
Fukuoka 819-0395, Japan

\*To whom correspondence should be addressed.

Email: kazunari@ms.ifoc.kyushu-u.ac.jp

- 1. Energy and adhesive force curves for the peel process of two structures shown in Figure 3b and 3c**
- 2. Energy and adhesive force curves for the tensile process of two structures shown in Figure 3b and 3c**
- 3. Fitting parameters and adhesion forces for each process of two structures shown in Figure 3b and 3c**

**S1. Energy and adhesive force curves for the peel process of two structures shown in Figure 3b and 3c**

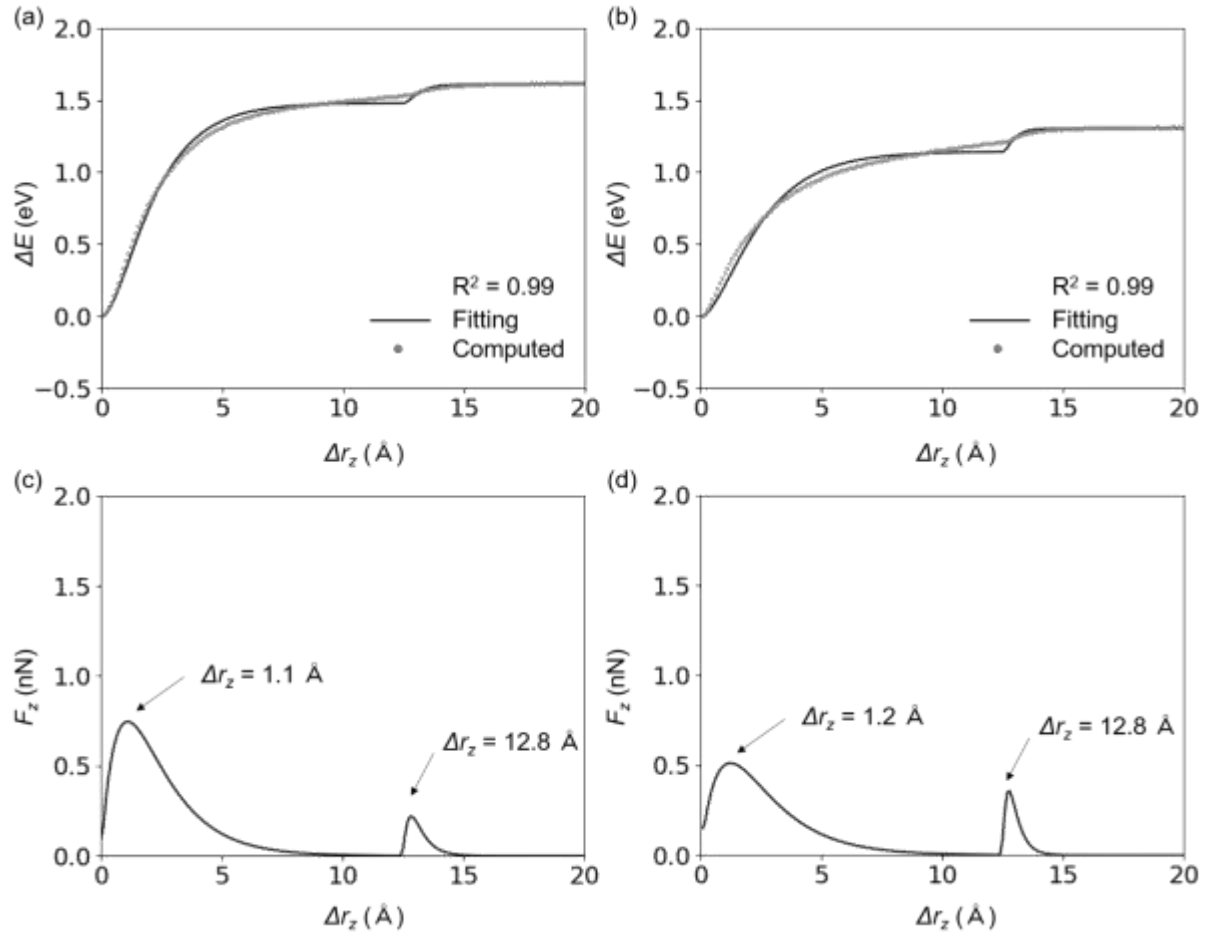

**Figure S1.** (a) and (b) correspond to potential energy-displacement ( $\Delta E$ - $\Delta r_z$ ) curves for the peel process of two structures shown in Figure 3b and 3c, respectively. Each point in the gray dotted line corresponds to the value obtained from the calculation, and the black solid line corresponds to the curve obtained by fitting. (c) and (d) correspond to adhesive force-displacement ( $F_z$  -  $\Delta r_z$ ) curves for the peel process of two structures shown in Figure 3b and 3c, respectively.

**S2. Energy and adhesive force curves for the tensile process of two structures shown in Figure 3b and 3c**

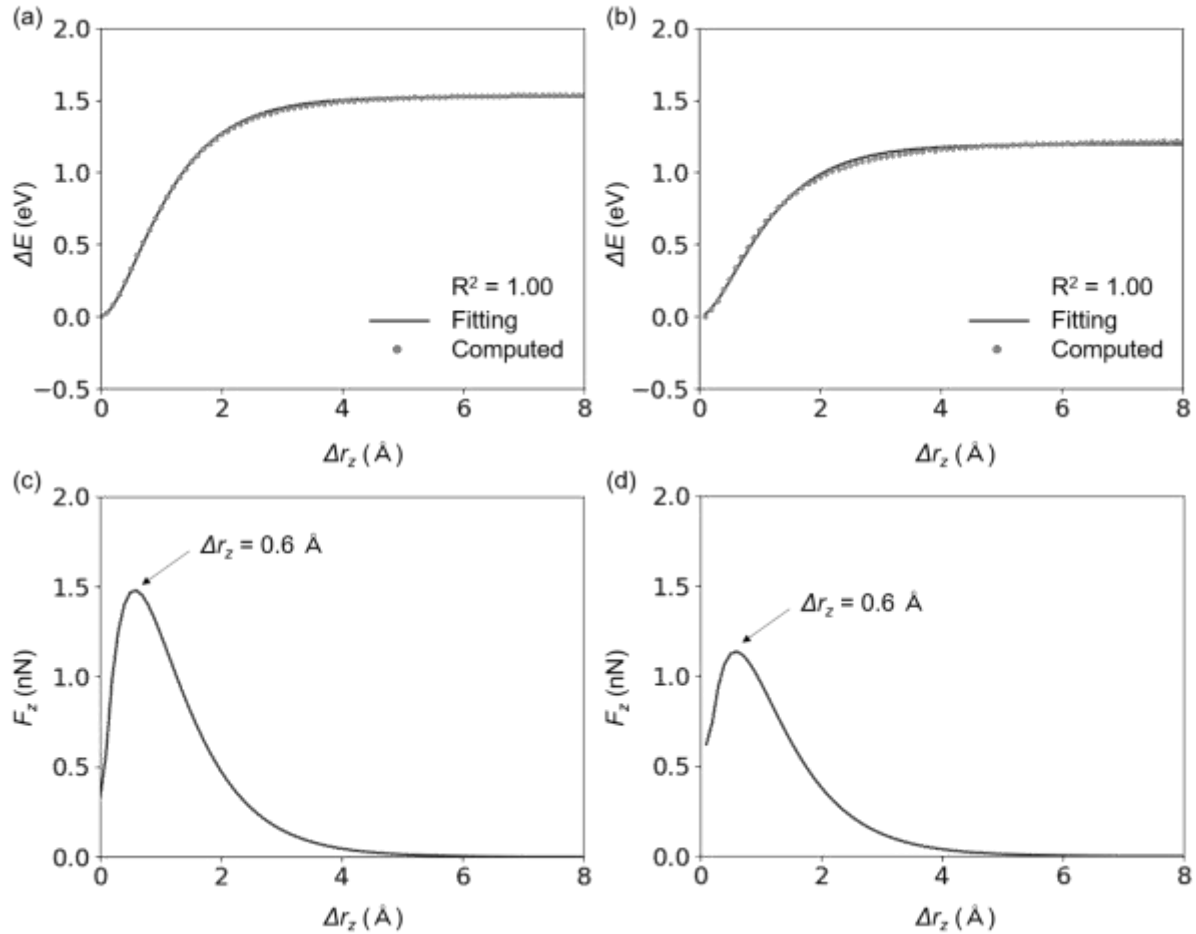

**Figure S2.** (a) and (b) correspond to potential energy-displacement ( $\Delta E$ - $\Delta r_z$ ) curves for the tensile process of two structures shown in Figure 3b and 3c, respectively. Each point in the gray dotted line corresponds to the value obtained from the calculation, and the black solid line corresponds to the curve obtained by fitting. (c) and (d) correspond to adhesive force-displacement ( $F_z$  -  $\Delta r_z$ ) curves for the tensile process of two structures shown in Figure 3b and 3c, respectively.

**S3. Fitting parameters and adhesion forces for each process of two structures shown in Figure 3b and 3c**

**Table S1.** Values of the fitting parameters ( $D_i$  and  $a_i$ ), the maximum values of adhesion forces  $F_i$ , and its displacement position  $\Delta r_i$  for the two peel processes and the tensile process of two structures shown in Figure 3b and 3c.

| Structure shown in Figure 3b |            |                          |                            |            |
|------------------------------|------------|--------------------------|----------------------------|------------|
| Peel process $i$             | $D_i$ (eV) | $a_i$ ( $\square^{-1}$ ) | $\Delta r_i$ ( $\square$ ) | $F_i$ (nN) |
| $i = 1$                      | 1.48       | 0.63                     | 1.1                        | 0.75       |
| $i = 2$                      | 0.13       | 2.15                     | 12.8                       | 0.22       |
| Tensile process              | $D$ (eV)   | $a$ ( $\square^{-1}$ )   | $\Delta r$ ( $\square$ )   | $F$ (nN)   |
|                              | 1.53       | 1.22                     | 0.6                        | 1.48       |
| Structure shown in Figure 3c |            |                          |                            |            |
| Peel process $i$             | $D_i$ (eV) | $a_i$ ( $\square^{-1}$ ) | $\Delta r_i$ ( $\square$ ) | $F_i$ (nN) |
| $i = 1$                      | 1.14       | 0.56                     | 1.2                        | 0.51       |
| $i = 2$                      | 0.16       | 2.85                     | 12.8                       | 0.36       |
| Tensile process              | $D$ (eV)   | $a$ ( $\square^{-1}$ )   | $\Delta r$ ( $\square$ )   | $F$ (nN)   |
|                              | 1.19       | 1.19                     | 0.6                        | 1.14       |
